# Supplementary material
Source: publisher figshare collection journal article supplement (https://future-science-group.figshare.com/ndownloader/files/31811408)
Supplement: Supplementary file 1 [file 31811408]

Supplementary Table 2 The number of patients in GEO datasets

| GEO accession | SLE | HC | RA | DM |
| --- | --- | --- | --- | --- |
| GSE20864 | 21 | 45 |  |  |
| GSE112087 | 62 | 58 |  |  |
| GSE122459 | 20 | 6 |  |  |
| GES144390 | 3 | 3 |  |  |
| GSE109248 | 7 | 13 |  |  |
| GES32591 | 64 | 29 |  |  |
| GSE121239 | 292 | 20 |  |  |
| GSE135779 | 7 | 5 |  |  |
| GSE96879 | 57 | 33 |  |  |
| GSE37426 | 8 | 4 |  |  |
| GSE102547 | 6 | 3 |  |  |
| GSE17755 | 22 |  | 112 |  |
| GSE100150 | 54 |  |  | 40 |
| GSE185047 | 169 |  |  |  |
| GSE84655 | 6 | 3 |  |  |
